# Supplementary material
Source: publisher figshare collection journal article supplement (https://acs.figshare.com/ndownloader/files/22235589)
Supplement: Supplementary file 1 [file 22235589]

## Supporting Information

### **Dual-Modal Photon Upconverting and Downshifting Emissions from Ultra-Stable CsPbBr<sub>3</sub> Perovskite Nanocrystals Triggered by Co-Growth of Tm:NaYbF<sub>4</sub> Nanocrystals in Glass**

Xiaoyan Li <sup>a,b,c,d</sup>, Changbin Yang <sup>a</sup>, Yunlong Yu <sup>b,c</sup>, Zheng Li <sup>a</sup>, Jidong Lin <sup>a</sup>,  
Xiangfeng Guan <sup>b</sup>, Zhiqiang Zheng <sup>a, d, \*</sup>, Daqin Chen <sup>a, d, e, \*</sup>

[a] College of Physics and Energy, Fujian Normal University, Fuzhou 350117, China

E-mail: [zqzheng@fjnu.edu.cn](mailto:zqzheng@fjnu.edu.cn) (Z. Q. Zheng); [dqchen@fjnu.edu.cn](mailto:dqchen@fjnu.edu.cn) (D. Q. Chen)

[b] College of Electronics and Information Science, Fujian Jiangxia University, Fuzhou 350108, China

[c] Key Laboratory of Green Perovskites Application of Fujian Province Universities, Fujian Jiangxia University, Fuzhou 350108, China

[d] Fujian Provincial Collaborative Innovation Center for Advanced High-Field Superconducting Materials and Engineering, Fuzhou 350117, China

[e] Fujian Provincial Engineering Technology Research Center of Solar Energy Conversion and Energy Storage, Fuzhou 350117, China

**Table S1.** Nominal glass compositions (mol%) for preparing dual-phase glasses containing Tm: NaYbF<sub>4</sub> UCNCs and CsPbBr<sub>3</sub> PQDs. The total mole content of glass composition is not fixed to 100% for better comparison throughout the text.

| Composition (mol%) |     | GeO <sub>2</sub> | B <sub>2</sub> O <sub>3</sub> | ZnO | CaO | Na <sub>2</sub> O | PbO | CsBr | YbF <sub>3</sub> | TmF <sub>3</sub> |
|--------------------|-----|------------------|-------------------------------|-----|-----|-------------------|-----|------|------------------|------------------|
| Sample             | S0  | 50               | 20                            | 5   | 3   | 6                 | 0   | 12   | 5                | 0.1              |
|                    | S1  | 50               | 20                            | 5   | 3   | 6                 | 1   | 12   | 5                | 0.1              |
|                    | S2  | 50               | 20                            | 5   | 3   | 6                 | 3   | 12   | 5                | 0.1              |
|                    | S3  | 50               | 20                            | 5   | 3   | 6                 | 5   | 12   | 5                | 0.1              |
|                    | S4  | 50               | 20                            | 5   | 3   | 6                 | 7   | 12   | 5                | 0.1              |
|                    | S5  | 50               | 20                            | 5   | 3   | 6                 | 3   | 8    | 5                | 0.1              |
|                    | S6  | 50               | 20                            | 5   | 3   | 6                 | 3   | 16   | 5                | 0.1              |
|                    | S7  | 50               | 20                            | 5   | 3   | 6                 | 3   | 20   | 5                | 0.1              |
|                    | S8  | 50               | 20                            | 5   | 3   | 6                 | 3   | 12   | 3                | 0.1              |
|                    | S9  | 50               | 20                            | 5   | 3   | 6                 | 0   | 12   | 8                | 0.1              |
|                    | S10 | 50               | 20                            | 5   | 3   | 6                 | 1   | 12   | 8                | 0.1              |
|                    | S11 | 50               | 20                            | 5   | 3   | 6                 | 3   | 12   | 8                | 0.1              |
|                    | S12 | 50               | 20                            | 5   | 3   | 6                 | 5   | 12   | 8                | 0.1              |
|                    | S13 | 50               | 20                            | 5   | 3   | 6                 | 7   | 12   | 8                | 0.1              |
|                    | S14 | 50               | 20                            | 5   | 3   | 6                 | 3   | 8    | 8                | 0.1              |
|                    | S15 | 50               | 20                            | 5   | 3   | 6                 | 3   | 16   | 8                | 0.1              |
|                    | S16 | 50               | 20                            | 5   | 3   | 6                 | 3   | 20   | 8                | 0.1              |

The mole contents of PbO (x mol%, x=1, 3, 5, 7), CsBr (y mol%, y=8, 12, 16, 20) and YbF<sub>3</sub> (z mol%, z=3, 5, 8) components in the glasses are modified to achieve dual-phase glasses with desirable crystallization phases and optimal optical performance.

**Table S2.** The fitted decay parameters for PL and UC exciton recombination of CsPbBr<sub>3</sub> PQDs in dual-phase glasses with different PbO contents (x=1, 3, 5, 7 mol%, fixed 12 mol% CsBr, 5 mol% YbF<sub>3</sub>).

|           |     | $A_1$ | $\tau_1$ (ns)       | $A_2$ | $\tau_2$ (ns)       | $A_3$ | $\tau_3$ (ns)       | $\tau_{ave}$ (ns)       |
|-----------|-----|-------|---------------------|-------|---------------------|-------|---------------------|-------------------------|
| <b>PL</b> | x=1 | 3752  | 9.67                | 1622  | 50.11               | 258   | 258.82              | 117                     |
| <b>PL</b> | x=3 | 5390  | 12.11               | 2523  | 62.95               | 479   | 286.72              | 138                     |
| <b>PL</b> | x=5 | 4357  | 5.40                | 1284  | 36.24               | 140   | 186.56              | 69                      |
| <b>PL</b> | x=7 | 4540  | 4.32                | 1044  | 24.65               | 129   | 114.26              | 40                      |
|           |     | $A_1$ | $\tau_1$ ( $\mu$ s) | $A_2$ | $\tau_2$ ( $\mu$ s) | $A_3$ | $\tau_3$ ( $\mu$ s) | $\tau_{ave}$ ( $\mu$ s) |
| <b>UC</b> | x=3 | 9461  | 185.00              | 1446  | 351.09              | --    | --                  | 222                     |

Owing to their non-single-exponential features, PL decay curves of exciton recombination can be described by the following three-exponential expression

$$I = A_1 \exp\left(-\frac{t}{\tau_1}\right) + A_2 \exp\left(-\frac{t}{\tau_2}\right) + A_3 \exp\left(-\frac{t}{\tau_3}\right)$$

Where  $A_1$ ,  $A_2$  and  $A_3$  are the fitting constants,  $\tau_1$ ,  $\tau_2$  and  $\tau_3$  are the corresponding decay times, respectively. The average lifetime can be determined by the following equation

$$\tau_{ave} = (A_1\tau_1^2 + A_2\tau_2^2 + A_3\tau_3^2)/(A_1\tau_1 + A_2\tau_2 + A_3\tau_3)$$

All the values are tabulated in **Table S2**.

Similarly, UC decay curves of exciton recombination can be described by the two-exponential expression and the related parameters are also provided in **Table S2** for comparison.

## Derivation of absolute temperature sensitivity and relative sensitivity

In the investigated dual-phase embedded glass, exciton recombination and  $\text{Tm}^{3+} {}^3\text{F}_{2,3} \rightarrow {}^3\text{H}_6$  transition are temperature detecting signals for their significant temperature-sensitive emissions, while  $\text{Tm}^{3+} {}^1\text{G}_4 \rightarrow {}^3\text{H}_6$  and  ${}^1\text{G}_4 \rightarrow {}^3\text{F}_4$  transitions act as the reference signals for their relatively temperature-insensitive emissions. Herein, FIR1 can be easily deduced according to the expression of temperature-dependent exciton recombination [S1,S2]

$$\text{FIR1} = \frac{I_{\text{PQDs em}}}{I_{477 \text{ nm}}} \approx \frac{1}{B + C \exp(-\Delta E / k_B T)}$$

where B and C are constants, T is absolute temperature,  $k_B$  is Boltzmann constant.  $\Delta E$  is nominal thermal quenching activation energy for the  $\text{CsPbBr}_3$  PQDs and  $\text{Tm}^{3+} {}^1\text{G}_4 \rightarrow {}^3\text{H}_6$  dual-emitting system. On the other hand, FIR2 data can be well fitted to temperature by the following exponential equation [S3,S4]

$$\text{FIR2} = \frac{I_{707 \text{ nm}}}{I_{650 \text{ nm}}} = D + E \times \exp(-F/T)$$

where D, E and F are constants.

According to these two FIR equations, absolute temperature sensitivity ( $S_a$ ) and relative temperature sensitivity ( $S_r$ ) can be further derived and expressed by the following equations.

**For FIR1**

$$S_{a(523/477)} = \left| \frac{\partial \text{FIR1}}{\partial T} \right| = \frac{C \exp(-\Delta E / k_B T)}{[B + C \exp(-\Delta E / k_B T)]^2} \times \frac{\Delta E}{k_B T^2}$$

$$S_{r(523/477)} = \left| \frac{1}{\text{FIR}} \frac{\partial \text{FIR1}}{\partial T} \right| \times 100\% = \frac{C \exp(-\Delta E / k_B T)}{B + C \exp(-\Delta E / k_B T)} \times \frac{\Delta E}{k_B T^2} \times 100\%$$

**For FIR2**

$$S_{a(707/650)} = \left| \frac{\partial \text{FIR2}}{\partial T} \right| = \exp(-F/T) \times \frac{EF}{T^2}$$

$$S_{r(707/650)} = \left| \frac{1}{\text{FIR}} \frac{\partial \text{FIR2}}{\partial T} \right| \times 100\% = \frac{\exp(-F/T)}{D + E \times \exp(-F/T)} \times \frac{EF}{T^2} \times 100\%$$

## References

- [S1] Li, X.; Wu, Y.; Zhang, S.; Cai, B.; Gu, Y.; Song, J.; Zeng, H.  $\text{CsPbX}_3$  Quantum Dots for Lighting and Displays: Room-Temperature Synthesis, Photoluminescence Superiorities, Underlying Origins and White Light-Emitting Diodes. *Adv. Funct. Mater.* **2016**, *26*, 2435-2445.
- [S2] Yuan, S.; Chen, D.; Li, X.; Zhong, J.; Xu, X. In Situ Crystallization Synthesis of  $\text{CsPbBr}_3$  Perovskite Quantum Dot-Embedded Glasses with Improved Stability for Solid-State Lighting and Random Upconverted Lasing. *ACS Appl. Mater. Interfaces* **2018**, *10*, 18918-18926.
- [S3] Chen, D.; Liu, S.; Wan, Z.; Chen, Y. A Highly Sensitive Upconverting Nano-Glass-Ceramic-Based Optical Thermometer. *J. Alloys Compd.* **2016**, *672*, 380-385.
- [S4] Xu, W.; Zhang, Z.; Cao, W. Excellent Optical Thermometry Based on Short-Wavelength Upconversion Emissions in  $\text{Er}^{3+}/\text{Yb}^{3+}$  Co-doped  $\text{CaWO}_4$ . *Opt. Lett.* **2012**, *37*, 4865.

**Table S3.** Absolute/relative sensitivities and temperature range of optical temperature sensors based on several typical luminescent materials.

| Sensing materials                                                                                    | FIR                                                                                  | Temperature range (K) | Maximal $S_a$ (K <sup>-1</sup> ) | Maximal $S_r$ (% K <sup>-1</sup> ) | Ref.*     |
|------------------------------------------------------------------------------------------------------|--------------------------------------------------------------------------------------|-----------------------|----------------------------------|------------------------------------|-----------|
| Tm <sup>3+</sup> : YF <sub>3</sub> glass ceramic                                                     | $I_{(Tm^{3+}:^3F_{2,3} \rightarrow ^3H_6)} / I_{(Tm^{3+}: ^1G_4 \rightarrow ^3F_4)}$ | 293-563               | 0.0184                           | --                                 | [S3]      |
| Tm <sup>3+</sup> /Yb <sup>3+</sup> : Y <sub>2</sub> Ti <sub>2</sub> O <sub>7</sub> phosphor          | $I_{(Tm^{3+}:^3F_{2,3} \rightarrow ^3H_6)} / I_{(Tm^{3+}: ^1G_4 \rightarrow ^3H_6)}$ | 293-398               | --                               | 0.81                               | [S5]      |
| Tm <sup>3+</sup> /Yb <sup>3+</sup> : SrWO <sub>4</sub>                                               | $I_{(Tm^{3+}:^3F_3 \rightarrow ^3H_6)} / I_{(Tm^{3+}: ^3H_4 \rightarrow ^3H_6)}$     | 308-573               | 0.0062                           | --                                 | [S6]      |
| Ho <sup>3+</sup> /Tm <sup>3+</sup> /Yb <sup>3+</sup> : Ba <sub>3</sub> Y <sub>4</sub> O <sub>9</sub> | $I_{(Tm^{3+}:^3H_4 \rightarrow ^3H_6)} / I_{(Tm^{3+}: ^1G_4 \rightarrow ^3H_6)}$     | 293-473               | 0.0552                           | 0.34                               | [S7]      |
| Pr <sup>3+</sup> : LaMg <sub>0.402</sub> Nb <sub>0.598</sub> O <sub>3</sub>                          | $I_{(Pr^{3+}:^1D_2 \rightarrow ^3H_4)} / I_{(Pr^{3+}: ^3P_0 \rightarrow ^3F_2)}$     | 298-523               | 0.0597                           | 0.73                               | [S8]      |
| CD/ RhB                                                                                              | $I_{CD} / I_{RhB}$                                                                   | 283-373               | 0.0201                           | 1.39                               | [S9]      |
| dual-phase glass                                                                                     | $I_{PQDs\ em} / I_{(Tm^{3+}: ^1G_4 \rightarrow ^3H_6)}$                              | 77-350                | 0.0474                           | 0.98                               | This work |
| dual-phase glass                                                                                     | $I_{(Tm^{3+}:^3F_{2,3} \rightarrow ^3H_6)} / I_{(Tm^{3+}: ^1G_4 \rightarrow ^3F_4)}$ | 300-700               | 0.4381                           | 1.35                               | This work |

\*References

- [S5] Tu, X.; Xu, J.; Li, M.; Xie, T.; Lei, R.; Wang, H.; Xu, S. Color-Tunable Upconversion Luminescence and Temperature Sensing Behavior of Tm<sup>3+</sup>/Yb<sup>3+</sup> Codoped Y<sub>2</sub>Ti<sub>2</sub>O<sub>7</sub> Phosphors. *Mater. Res. Bull.* **2019**, *112*, 77-83.
- [S6] Song, H.; Wang, C.; Han, Q.; Tang, X.; Yan, W.; Chen, Y.; Jiang, J.; Liu, T. Highly Sensitive Tm<sup>3+</sup>/Yb<sup>3+</sup> Codoped SrWO<sub>4</sub> for Optical Thermometry. *Sensor. Actuat. A Phys.* **2018**, *271*, 278-282.
- [S7] Liu, S.; Cui, J.; Jia, J.; Fu, J.; You, W.; Zeng, Q.; Yang, Y.; Ye, X. High Sensitive Ln<sup>3+</sup>/Tm<sup>3+</sup>/Yb<sup>3+</sup> (Ln<sup>3+</sup>= Ho<sup>3+</sup>, Er<sup>3+</sup>) Tri-Doped Ba<sub>3</sub>Y<sub>4</sub>O<sub>9</sub> Upconverting Optical Thermometric Materials Based on Diverse Thermal Response from Non-Thermally Coupled Energy Levels. *Ceram. Int.* **2019**, *45*, 1-10.
- [S8] Zhang, H.; Gao, Z.; Li, G.; Zhu, Y.; Liu, S.; Li, K.; Liang, Y. A Ratiometric Optical Thermometer with Multi-Color Emission and High Sensitivity Based on Double Perovskite LaMg<sub>0.402</sub>Nb<sub>0.598</sub>O<sub>3</sub>: Pr<sup>3+</sup> Thermochromic Phosphors. *Chem. Eng. J.* **2020**, *380*, 122491.
- [S9] Zhu, Z.; Sun, Z.; Guo, Z.; Zhang, X.; Wu, Z. chao. A High-Sensitive Ratiometric Luminescent Thermometer Based on Dual-Emission of Carbon Dots/Rhodamine B Nanocomposite. *J. Colloid Interface Sci.* **2019**, *552*, 572-582.

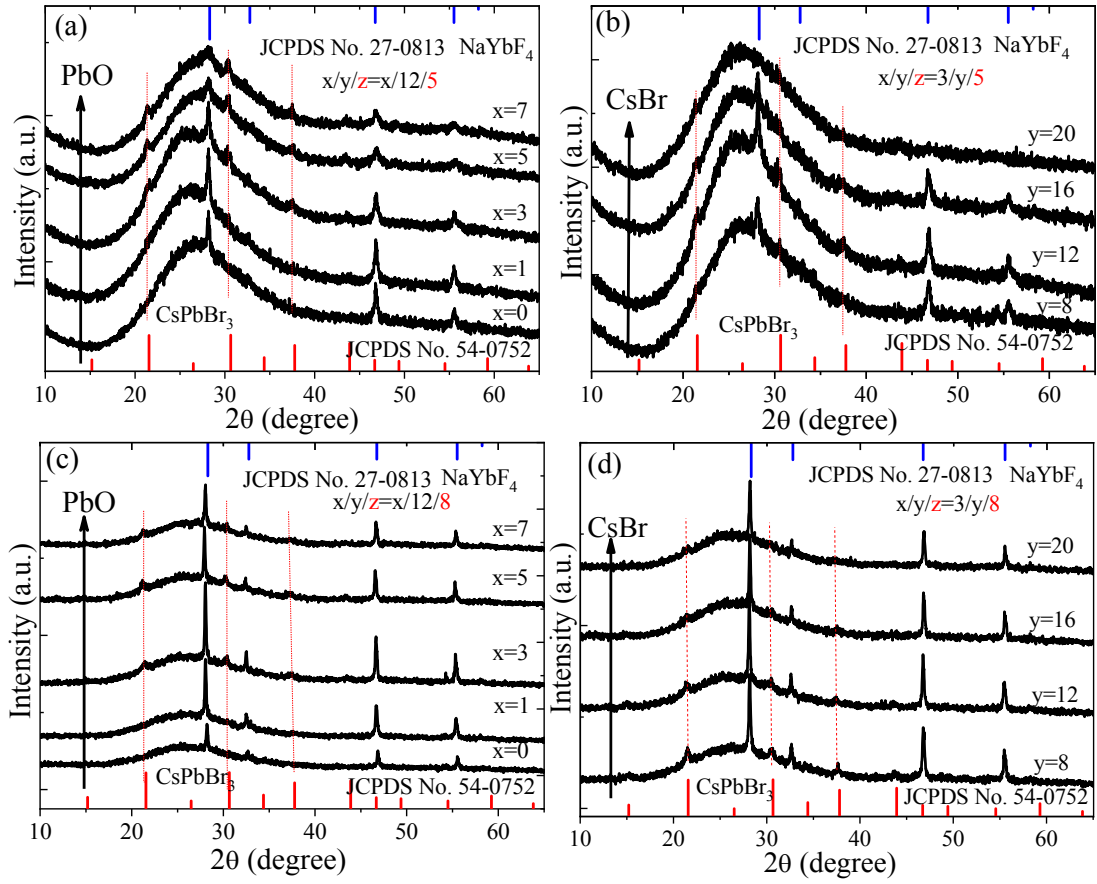

**Figure S1.** XRD patterns of a series of dual-phase glass samples: (a) different PbO contents (fixed 12 mol% CsBr and 5 mol% YbF<sub>3</sub>), (b) different CsBr contents (fixed 3 mol% PbO and 5 mol% YbF<sub>3</sub>), (c) different PbO contents (fixed 12 mol% CsBr and 8 mol% YbF<sub>3</sub>) and (d) different CsBr contents (fixed 3 mol% PbO and 8 mol% YbF<sub>3</sub>). Bars represent standard diffraction peaks of cubic NaYbF<sub>4</sub> (JCPDS No. 27-0813) and cubic CsPbBr<sub>3</sub> (JCPDS No. 54-0752) crystals.

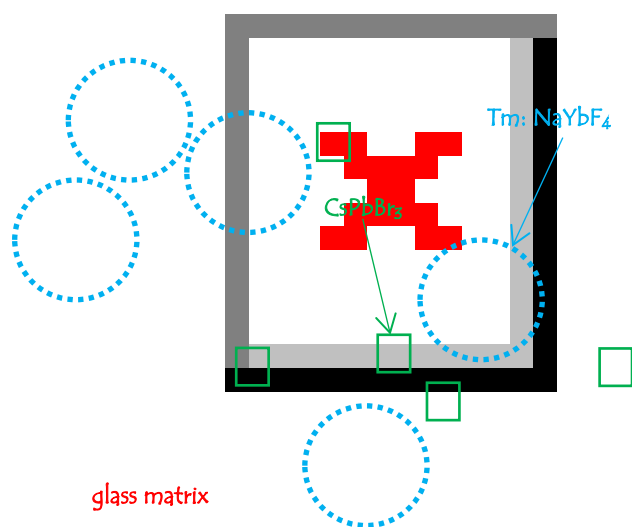

**Figure S2.** HAADF-STEM micrograph for a typical  $\text{CsPbBr}_3$  and  $\text{NaYbF}_4$  dual-phase embedded glass, showing the co-existence of small-size  $\text{CsPbBr}_3$  PNCs (bright contrast) and large-size  $\text{Tm: NaYbF}_4$  UCNCs (bright contrast) inside glass matrix (dark contrast). Some of  $\text{CsPbBr}_3$  PNCs and  $\text{Tm: NaYbF}_4$  UCNCs are marked by circle and rectangle, respectively.

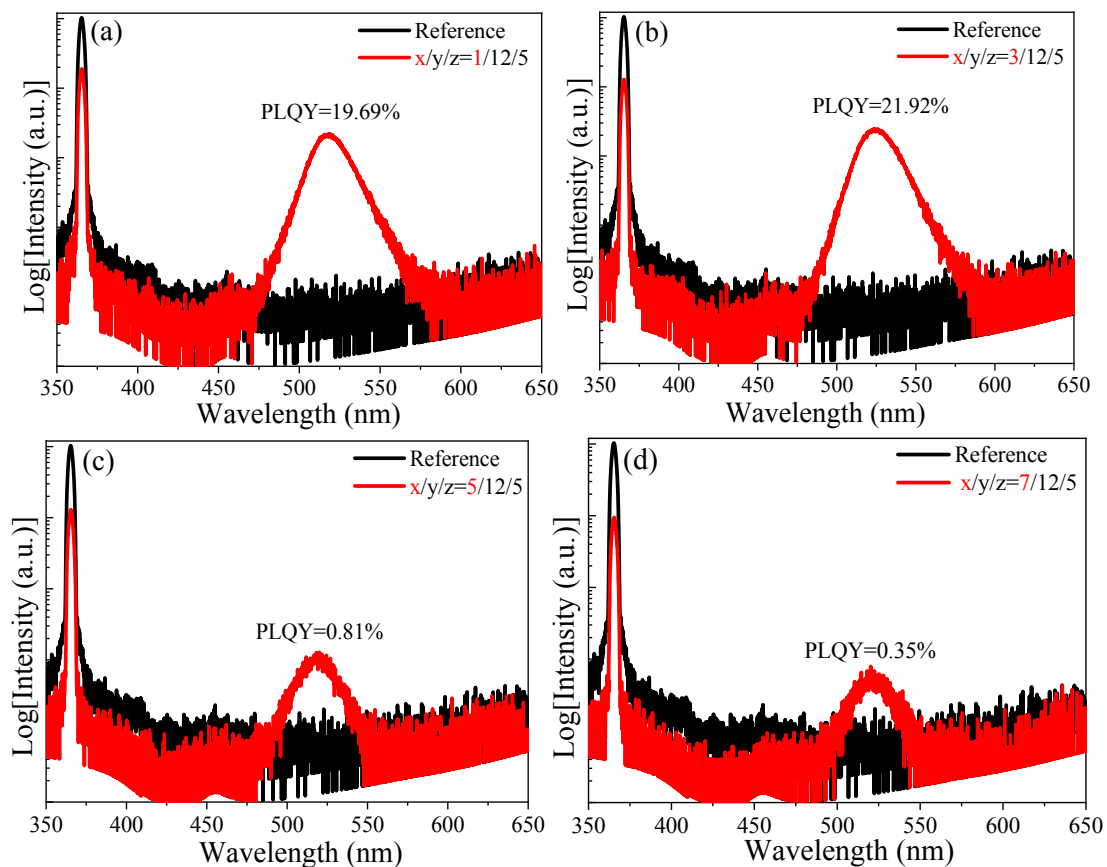

**Figure S3.** Quantitative PL spectra of dual-phase glasses with fixed 12 mol% CsBr, fixed 5 mol% YbF<sub>3</sub> and different PbO contents: (a) x=1 mol%, (b) x=3 mol%, (c) x=5 mol% and (d) x=7 mol%. PLQY values, defined as the ratio of emitted photons to absorbed photons, can be accordingly calculated. The reference for PLQY measurement is the blank glass without perovskite components, and the sharp peak at 365 nm is the excitation light (the integrated area represents the absorbed intensity).



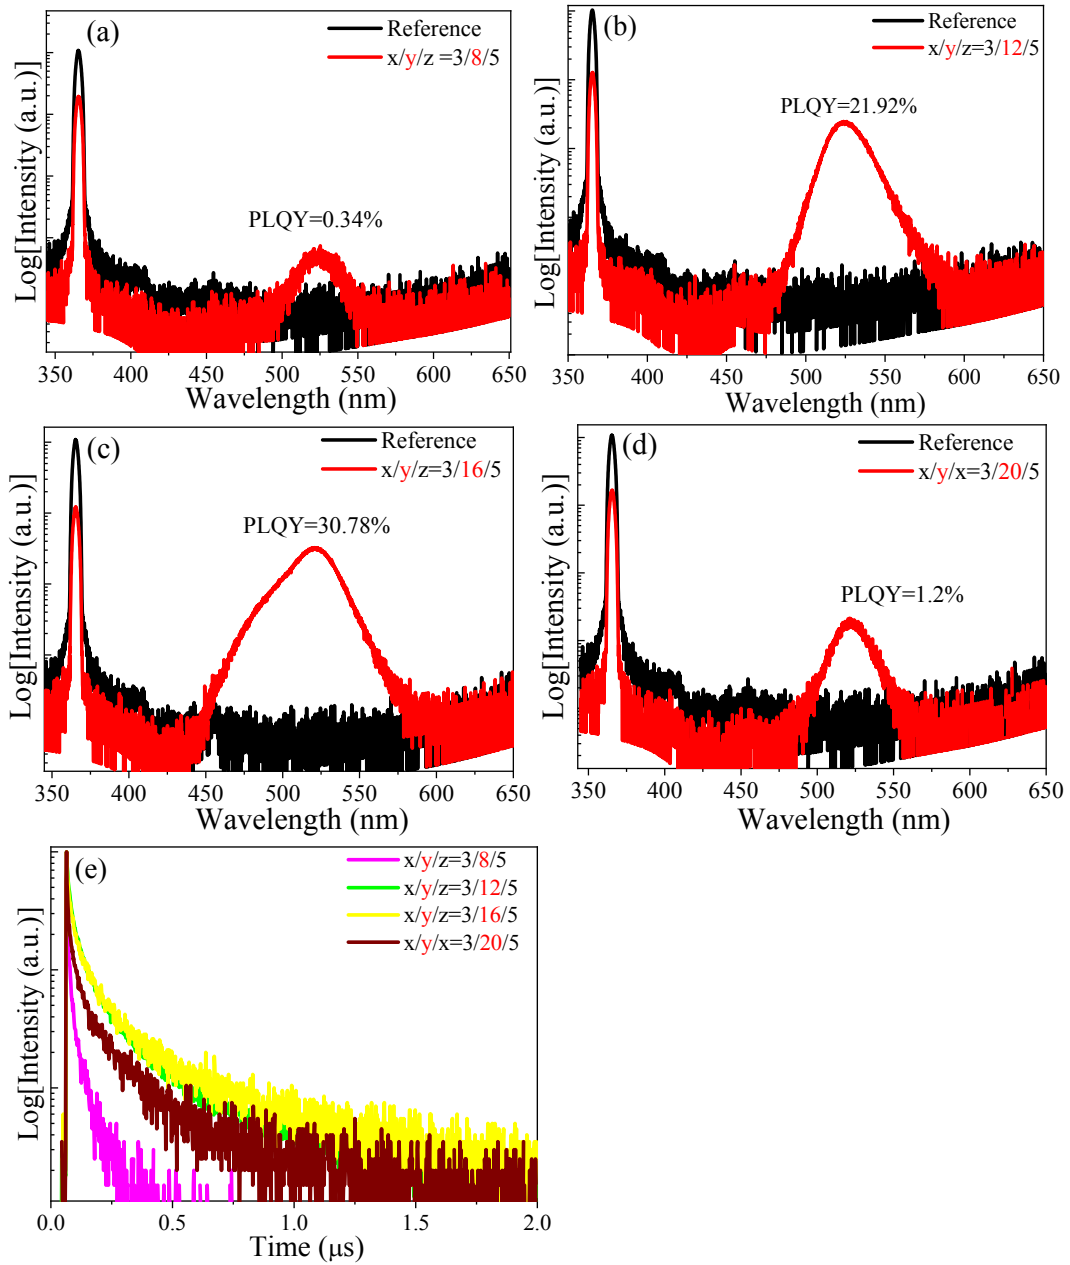

**Figure S4.** Quantitative PL spectra of dual-phase glasses with fixed 3 mol% PbO, fixed 5 mol% YbF<sub>3</sub> and different CsBr contents: (a) y=8 mol%, (b) x=12 mol%, (c) x=16 mol% and (d) x=20 mol%. PLQY values, defined as the ratio of emitted photons to absorbed photons, can be accordingly calculated. (e) The corresponding PL decay behaviors shows the same variation tendency as PLQYs.

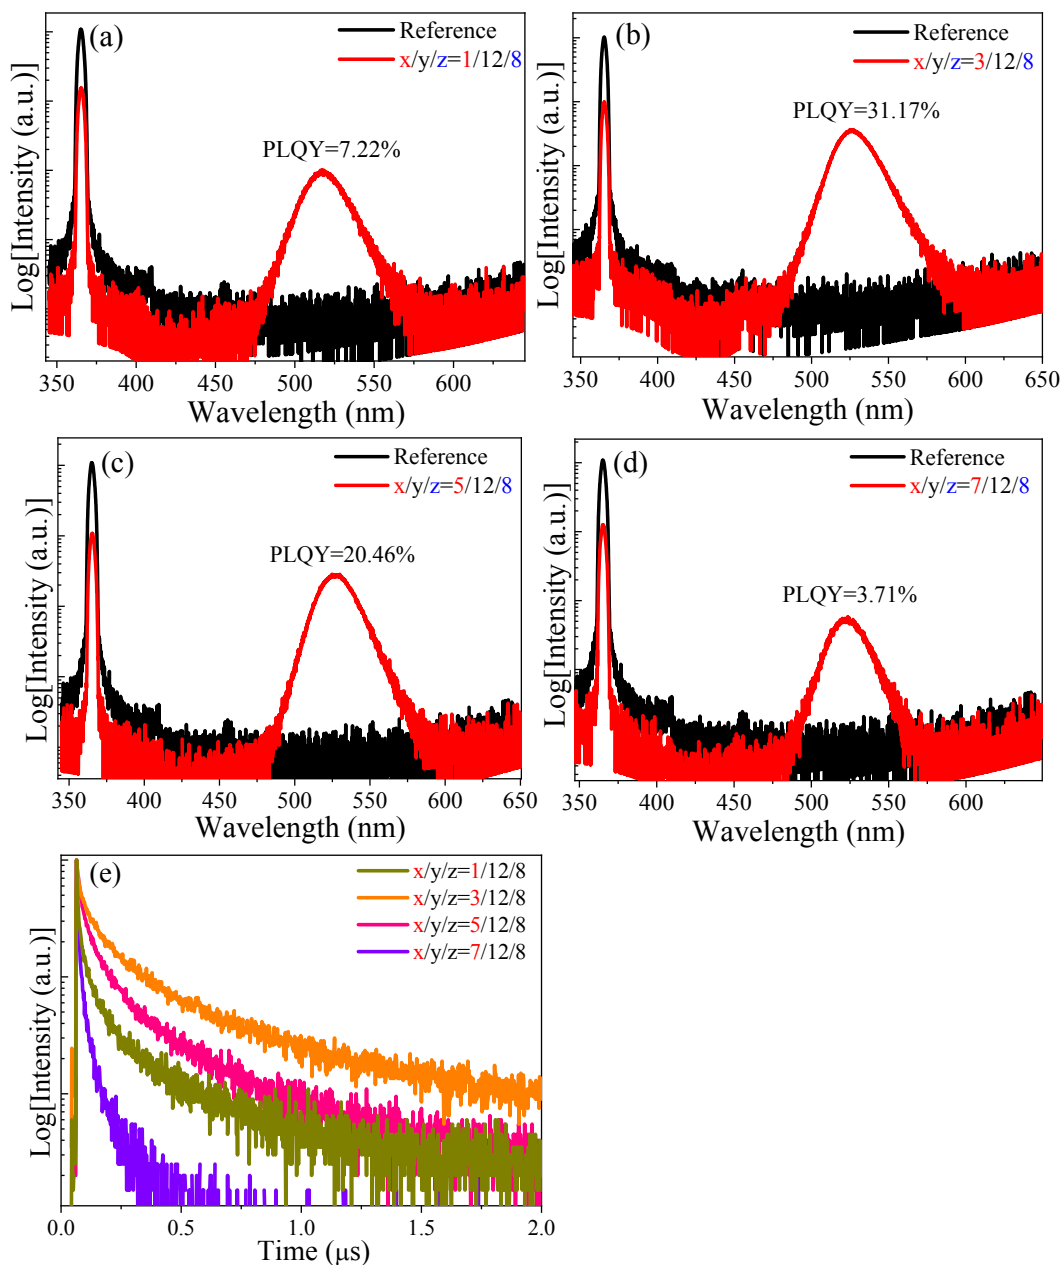

**Figure S5.** Quantitative PL spectra of dual-phase glasses with fixed 12 mol% CsBr, fixed 8 mol% YbF<sub>3</sub> and different PbO contents: (a)  $x=1$  mol%, (b)  $x=3$  mol%, (c)  $x=5$  mol% and (d)  $x=7$  mol%. PLQY values, defined as the ratio of emitted photons to absorbed photons, can be accordingly calculated. (e) The corresponding PL decay behaviors shows the same variation tendency as PLQYs.

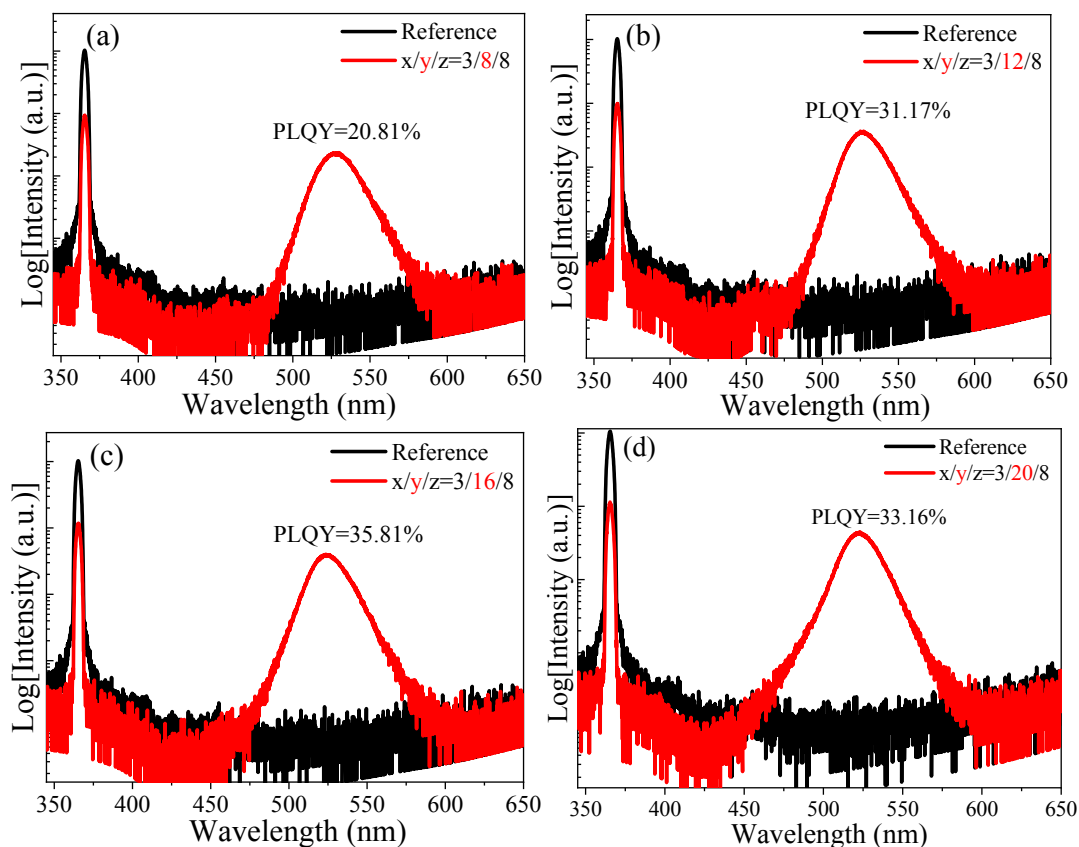

**Figure S6.** Quantitative PL spectra of dual-phase glasses with fixed 3 mol% PbO, fixed 8 mol% YbF<sub>3</sub> and different CsBr contents: (a) y=8 mol%, (b) x=12 mol%, (c) x=16 mol% and (d) x=20 mol%. PLQY values, defined as the ratio of emitted photons to absorbed photons, can be accordingly calculated.

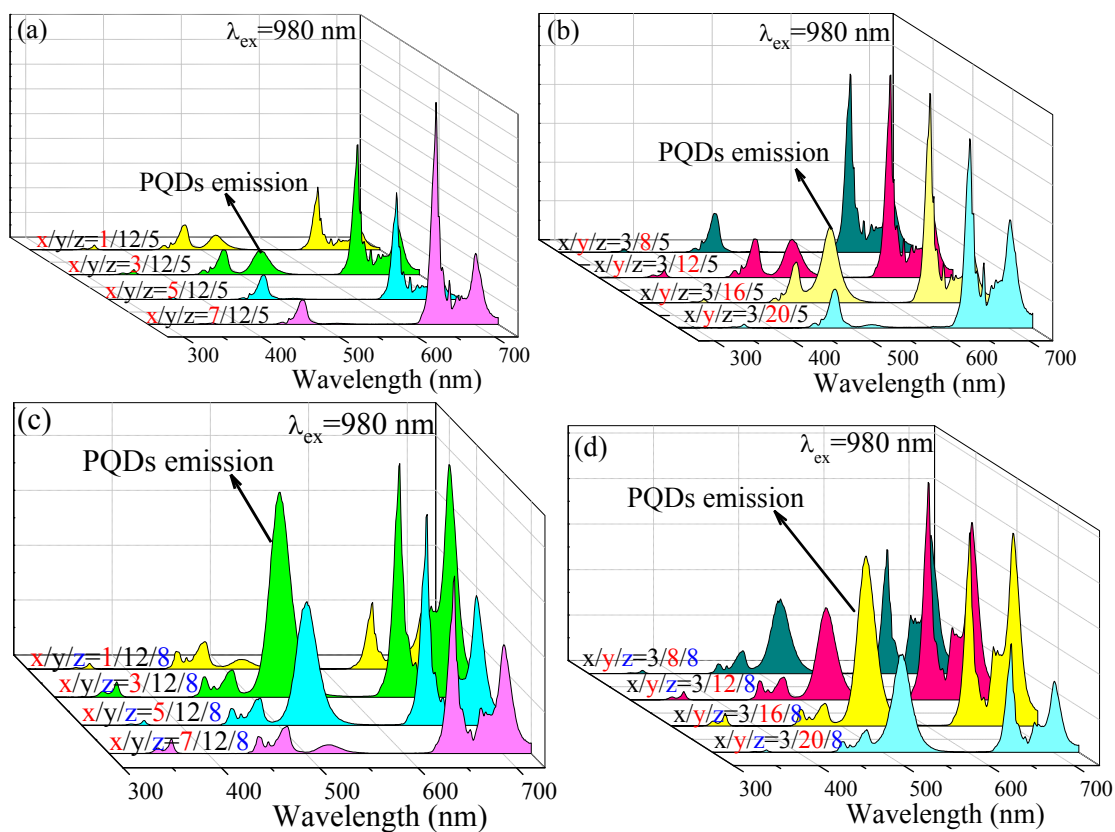

**Figure S7.** UC emission spectra of a series of dual-phase glasses under the excitation of 980 nm NIR laser: (a) various PbO contents (1~7 mol%, fixed 12 mol% CsBr and 5 mol% YbF<sub>3</sub>), (b) various CsBr contents (8~20 mol%, fixed 3 mol% PbO and 5 mol% YbF<sub>3</sub>), (c) various PbO contents (1~7 mol%, fixed 12 mol% CsBr and 8 mol% YbF<sub>3</sub>) and (d) various CsBr contents (8~20 mol%, fixed 3 mol% PbO and 8 mol% YbF<sub>3</sub>). All the samples show typical 523 nm UC emission band originated from exciton recombination of CsPbBr<sub>3</sub> PQDs inside the glasses.

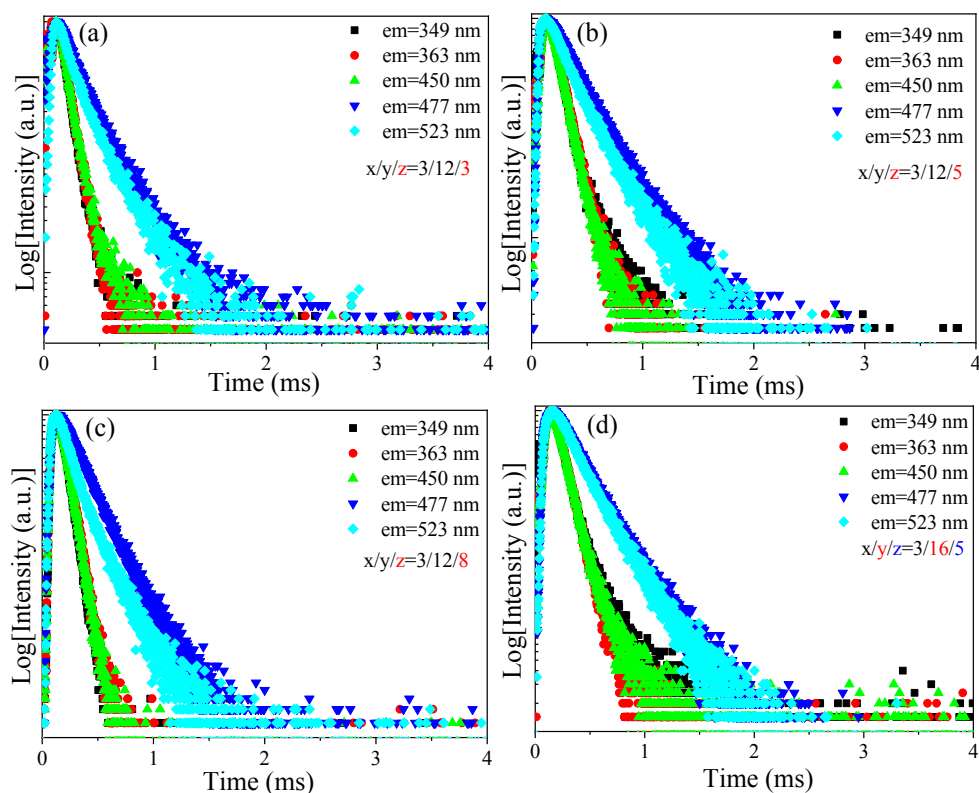

**Figure S8.** UC decay curves for a series of dual-phase glasses by monitoring 349 nm ( $^1I_6 \rightarrow ^3F_4$ ), 363 nm ( $^1D_2 \rightarrow ^3H_6$ ), 450 nm ( $^1D_2 \rightarrow ^3F_4$ ), 477 nm ( $^1G_4 \rightarrow ^3H_6$ ) emissions of  $Tm^{3+}$  and 523 nm exciton recombination of  $CsPbBr_3$  PQDs: (a-c) different contents of  $YbF_3$  component (3, 5, 8 mol%) in glasses with fixed 3 mol%  $PbO$  and 12 mol%  $CsBr$ , and (d) 3 mol%  $PbO$ , 16 mol%  $CsBr$  and 5 mol%  $YbF_3$  components in the glass.

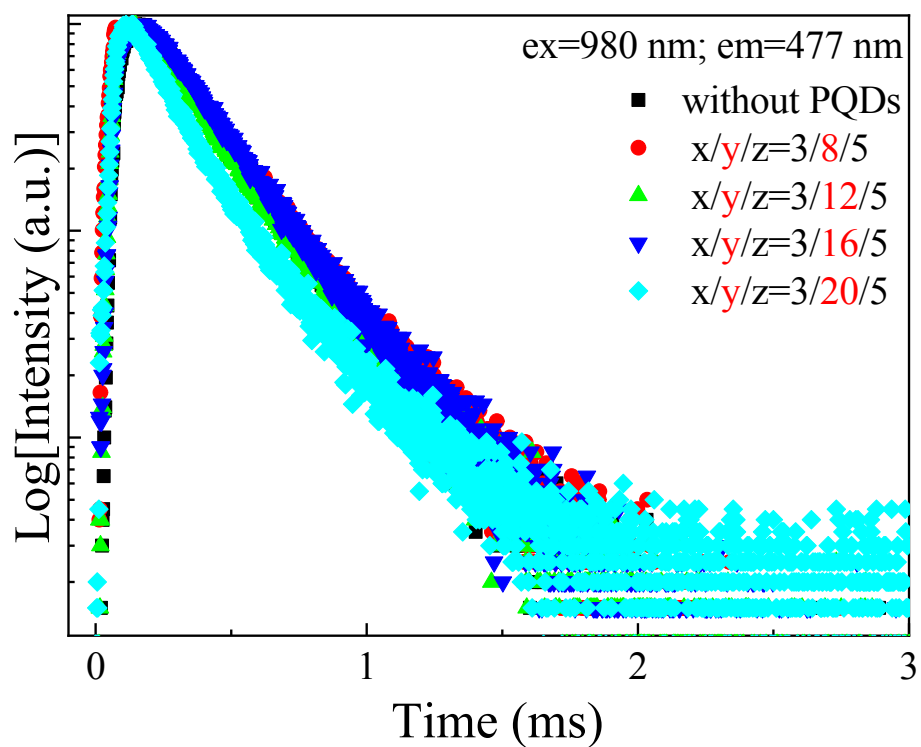

**Figure S9.** UC decay curves for a series of dual-phase glasses with different contents of CsBr component (8~20 mol%, fixed 3 mol% PbO and 5 mol% YbF<sub>3</sub>) by monitoring Tm<sup>3+</sup> 477 nm (<sup>1</sup>G<sub>4</sub>→<sup>3</sup>H<sub>6</sub>) emission. As a comparison, UC decay of Tm<sup>3+</sup> <sup>1</sup>G<sub>4</sub> emitting state for the glass containing only Tm: NaYbF<sub>4</sub> NCs (without CsPbBr<sub>3</sub> PQDs) is provided. Evidently, decay behaviors of Tm<sup>3+</sup> <sup>1</sup>G<sub>4</sub> emitting state are almost identical for all the samples.

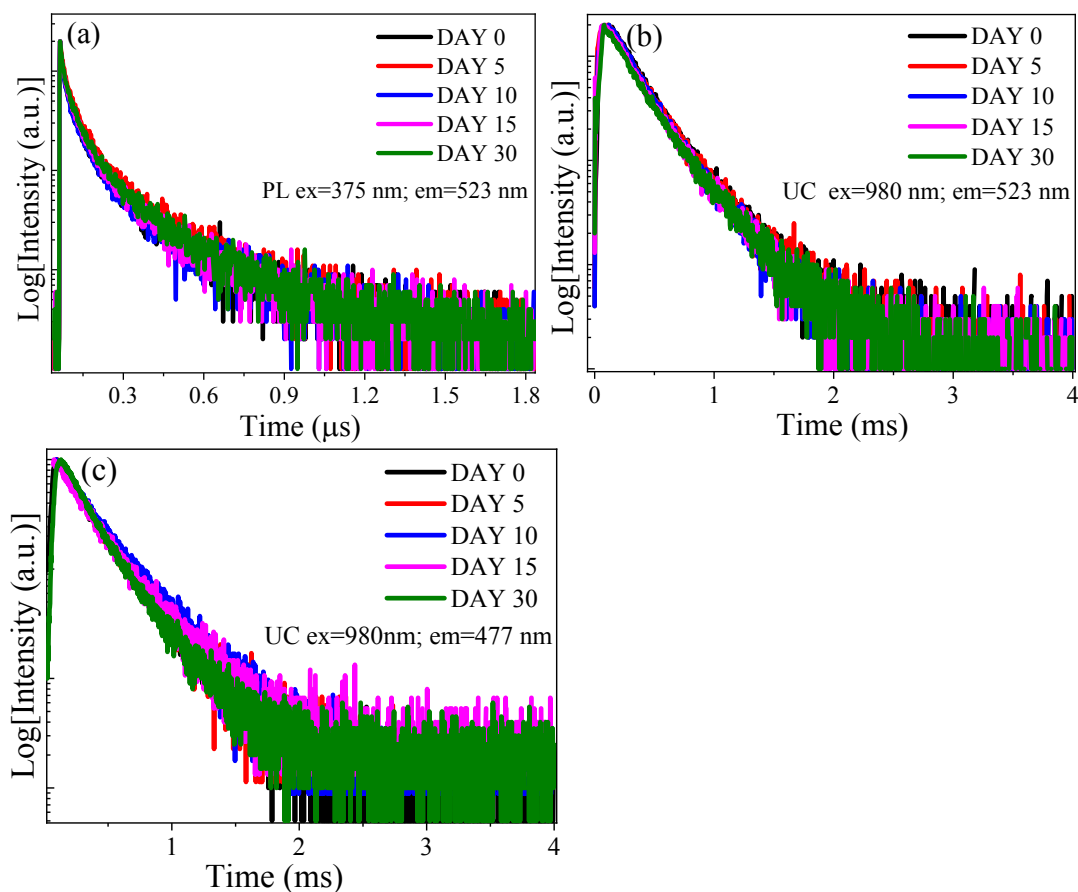

**Figure S10.** Long-term stability test by directly immersing dual-phase glass in water for 30 days and recording (a) PL decays of exciton recombination, (b) UC decays of exciton recombination and (c) UC decay of Tm<sup>3+</sup> 477 nm (<sup>1</sup>G<sub>4</sub>→<sup>3</sup>H<sub>6</sub>) emission. With elongation of storing time in water, PL decay of exciton recombination and UC radiative kinetics of exciton recombination and Tm<sup>3+</sup> <sup>1</sup>G<sub>4</sub>→<sup>3</sup>H<sub>6</sub> transition in the dual-phase glass are not remarkably altered.

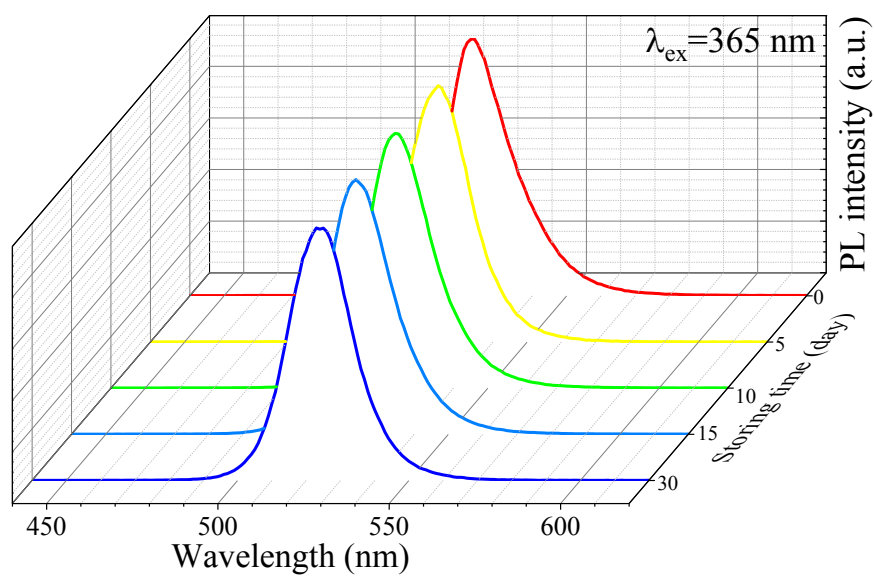

**Figure S11.** Long-term stability test by directly immersing dual-phase glass in water for 30 days and recording the corresponding PL spectra of exciton recombination. With increase of immersing time from 0 to 30 days, no obvious change in PL intensity and spectral profile.



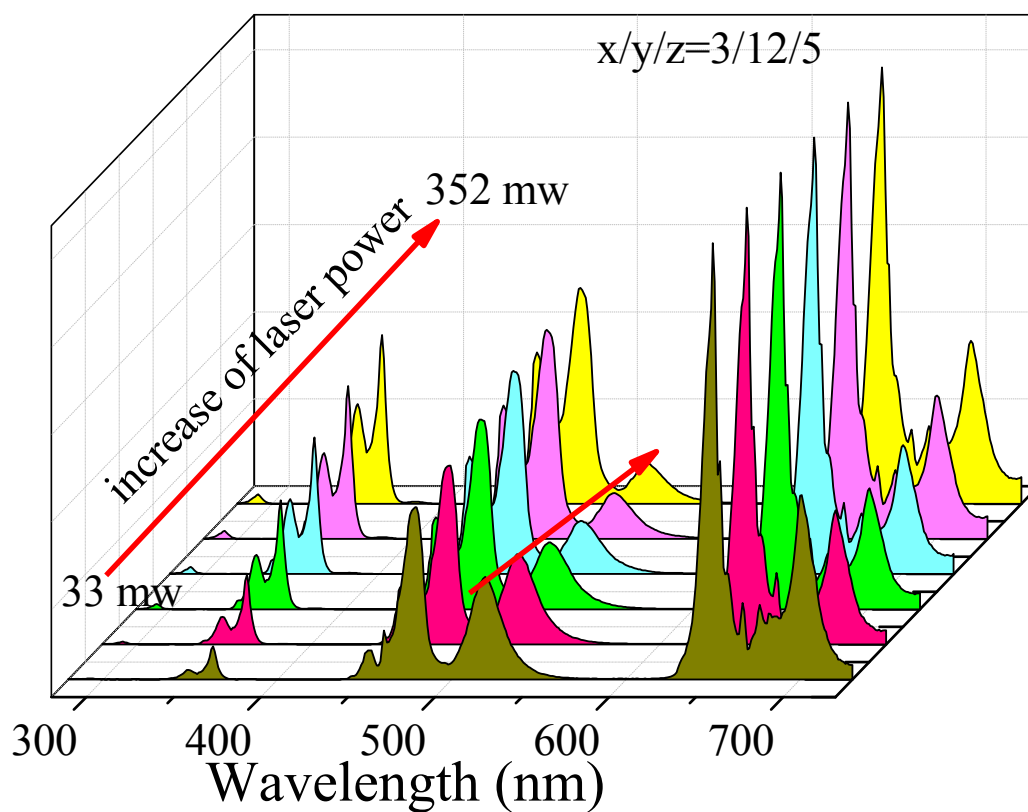

**Figure S12.** UC emission spectra for Tm: NaYbF<sub>4</sub> & CsPbBr<sub>3</sub> dual-phase glass under single-modal excitation at 980 nm with different laser power. All the spectra are normalized to Tm<sup>3+</sup> 477 nm (<sup>1</sup>G<sub>4</sub>→<sup>3</sup>H<sub>6</sub>) emission. With increase of NIR laser power, 523 nm UC emission intensity from exciton recombination gradually weakens owing to laser-induced thermal quenching of exciton recombination.

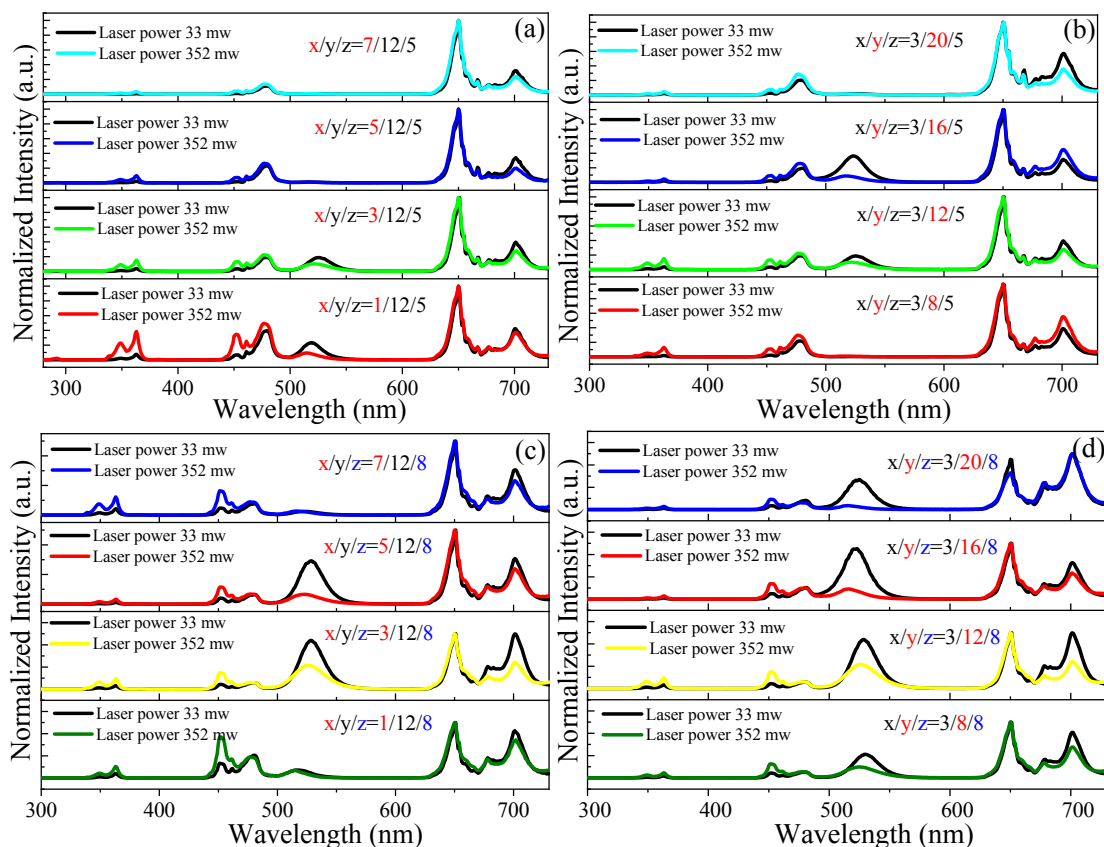

**Figure S13.** Normalized UC emission spectra for a series of dual-phase glasses under single-modal excitation at 980 nm with low/high (33 mW or 352 mW) laser power: (a) various PbO contents (1~7 mol%, fixed 12 mol% CsBr and 5 mol% YbF<sub>3</sub>), (b) various CsBr contents (8~20 mol%, fixed 3 mol% PbO and 5 mol% YbF<sub>3</sub>), (c) various PbO contents (1~7 mol%, fixed 12 mol% CsBr and 8 mol% YbF<sub>3</sub>) and (d) various CsBr contents (8~20 mol%, fixed 3 mol% PbO and 8 mol% YbF<sub>3</sub>). Compared to the case of low-power laser excitation, 523 nm UC emission intensity from exciton recombination weakens upon high-power laser excitation for all the samples.

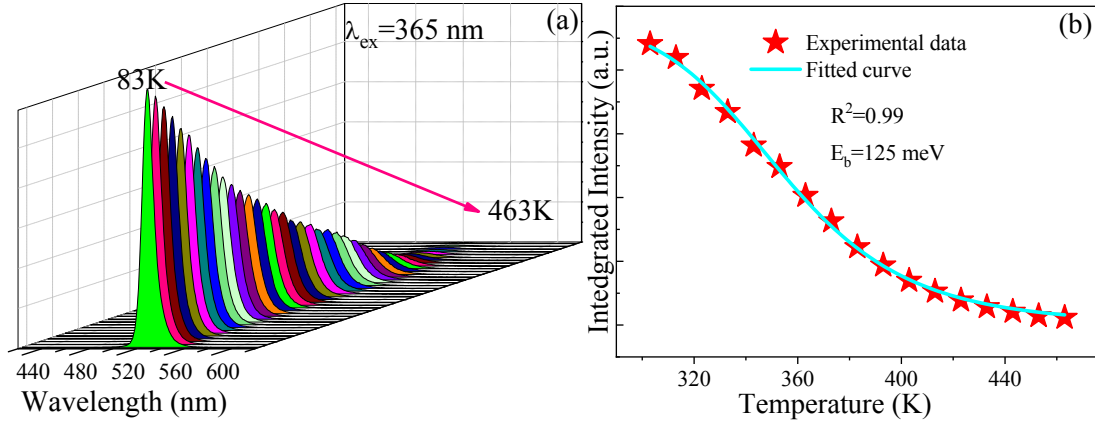

**Figure S14.** (a) Temperature-dependent PL spectra of dual-phase glass under 365 nm UV light excitation. (b) Integrated emission intensity of CsPbBr<sub>3</sub> PQDs as a function of temperature. The fitted curve and the obtained exciton recombination energy ( $E_b$ ) are provided in the figure.

The important physical parameter of exciton binding energy of CsPbBr<sub>3</sub> PQDs inside glass can be estimated with the following equation [7,25]

$$I(T) = \frac{I_0}{1 + A \exp^{-E_b/(k_B T)}}$$

where  $I(T)$  and  $I_0$  are PL intensities at temperature  $T$  and 0 K, respectively,  $T$  is absolute temperature,  $A$  is a pre-exponential constant,  $k_B$  is Boltzmann constant and  $E_b$  is exciton binding energy. With increase of temperature, the integrated emission intensity of CsPbBr<sub>3</sub> PQDs rapidly decreases, which is caused by temperature quenching. The exciton binding energy is 125 meV by fitting the experimental data with the above-mentioned expression.

\*References 7 and 25 are listed in the manuscript.

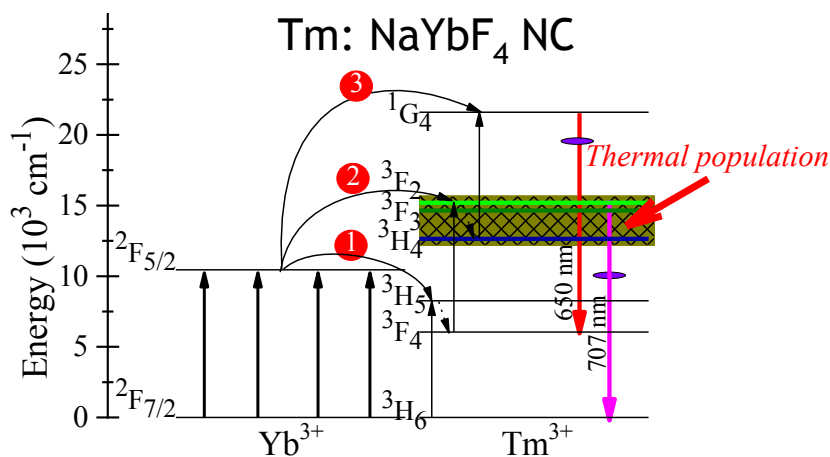

**Figure S15.** Energy level diagrams of  $\text{Yb}^{3+}$  and  $\text{Tm}^{3+}$  ions, showing the thermally coupled states of  $^3\text{H}_4$  and  $^3\text{F}_{2,3}$  and the possible energy transfer processes to populate  $^3\text{H}_4$ ,  $^3\text{F}_{2,3}$  and  $^1\text{G}_4$  emitting-states of  $\text{Tm}^{3+}$ .

The  $^3\text{F}_{2,3}$  and  $^3\text{H}_4$  states of  $\text{Tm}^{3+}$  are eligible to act as thermally coupled states because of the suitable energy gap between them ( $\sim 2000 \text{ cm}^{-1}$ ). With increase of temperature, the  $^3\text{F}_{2,3}$  states are populated via thermal activation while the  $^3\text{H}_4$  state is depopulated. The population of  $^1\text{G}_4$  state of  $\text{Tm}^{3+}$  is originated from  $^3\text{H}_4$  one. Therefore, temperature sensitive fluorescence intensity ratio (FIR) of  $\text{Tm}^{3+}$  between  $^3\text{F}_{2,3} \rightarrow ^3\text{H}_6$  transition (707 nm) and  $^1\text{G}_4 \rightarrow ^3\text{F}_4$  one (650 nm) is expected.
